# Supplementary material for: Ti-SBA-15 supported Cu–MgO catalyst for synthesis of isobutyraldehyde from methanol and ethanol
Source: Royal Society of Chemistry journal article supplement (doi:10.1039/c6ra09379e), 2016-01-01
Supplement: c6ra09379e1.pdf [file c6ra09379e1.pdf]

Supplement information

Tab. S1 Catalytic performance of 30Cu9.75MTS-500

| Catalyst          |          | 30Cu9.75MTS-500 |       |   |
|-------------------|----------|-----------------|-------|---|
| Reaction time (h) |          | 4               | 6     | 8 |
| Conversion (%)    | Methanol | 29.30           | 16.64 | \ |
|                   | Ethanol  | 90.31           | 81.53 | \ |
| Selectivity (%)   | AA       | 12.77           | 18.61 | \ |
|                   | PA       | 5.83            | 4.22  | \ |
|                   | IBA      | 10.66           | 1.69  | \ |
|                   | MA       | 1.23            | 0.60  | \ |
|                   | EA       | 9.13            | 5.58  | \ |
|                   | POL      | 1.49            | 1.75  | \ |
|                   | IBOL     | 2.49            | 1.37  | \ |

Tab. S2 Gas composition in outlet over the 20C6.5MTS-400 after 6 h reaction

| Outlet gas         | H <sub>2</sub> | CO   | CH <sub>4</sub> | CO <sub>2</sub> | C <sub>2</sub> | DME  | MEOH | C <sub>3</sub> | C <sub>4+</sub> |
|--------------------|----------------|------|-----------------|-----------------|----------------|------|------|----------------|-----------------|
| Volume fraction(%) | 49.9           | 3.03 | 1.85            | 0               | 2.64           | 8.95 | 13.3 | 4.94           | 15.3            |

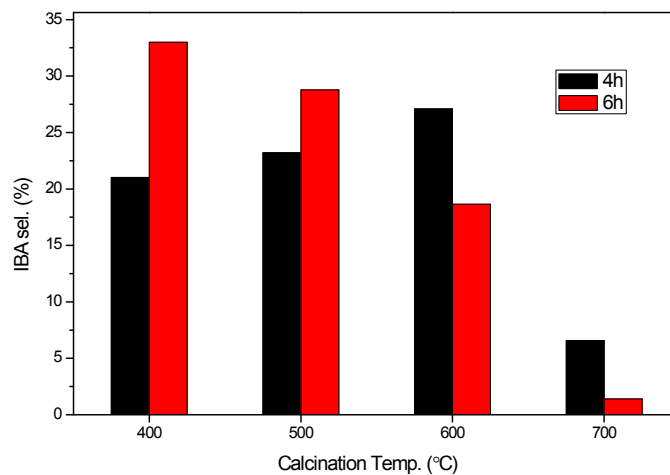

Fig. S1 IBA selectivity on the presentative catalysts in period of 4 and 6 h reaction, respectively.

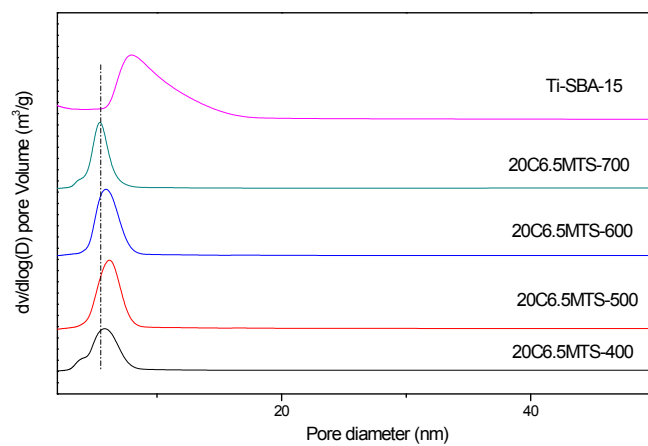

Fig. S2 Pore distribution of the representative catalysts calcined at different temperatures and Ti-SBA-15

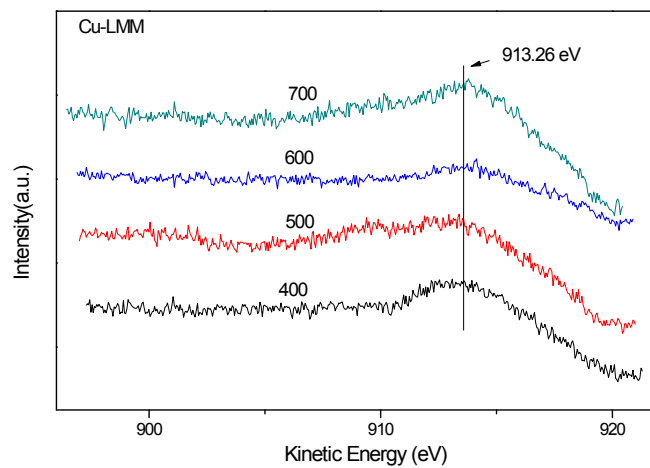

Fig. S3 Cu<sub>2</sub>p auger electron spectroscopy of the representative catalysts
